1  
2  
3  
4  
5  
6  
7  
8  
9  
10  
11  
12  
13  
14  
15  
16  
17  
18  
19  
20  
21  
22  
23  
24  
25  
26  
27  
28  
29  
30  
31  
32  
33  
34  
35  
36  
37  
38  
39  
40  
41  
42  
43  
44  
45  
46  
47

## **Transient telomerase inhibition alters cell cycle kinetics**

Connor AH Thompson 1, Alice YM Gu 1, Sunny Y Yang 1, Veena Mathew 2, Helen B Fleisig 1, and Judy MY Wong 1.

1 Faculty of Pharmaceutical Sciences, University of British Columbia  
2 Terry Fox Laboratory, British Columbia Cancer Research Centre, BC Cancer Agency.

Running Title: Telomerase inhibition alters cell cycle kinetics

Keywords: telomerase, telomere, telomere loop, cell cycle, imetelstat

Financial support for this work was provided by Research Investment Funds from the Faculty of Pharmaceutical Sciences at UBC.

Corresponding author:

Judy Wong  
University of British Columbia  
2405 Westbrook Mall  
Vancouver, BC  
Canada V6T 1Z3

Ph 604-827-3314  
FAX 604-822-3035  
[judy.wong@ubc.ca](mailto:judy.wong@ubc.ca)

Classification: Biological Sciences - Cell Biology

Conflict of interest:

The authors declare no conflict of interest.

Imetelstat provided by Geron Corporation.

Abstract: 250 words

Significance statement: 111 words

Main text: 4636 words

Figures: 6

48 **ABSTRACT**

49 Telomerase is the ribonucleoprotein reverse transcriptase that catalyzes the  
50 synthesis of telomeres at the ends of linear human chromosomes and  
51 contributes to proper chromosomal capping function. Formation of the telomere-  
52 loop (T-loop), an obligate step before cell division can proceed, requires the  
53 generation of a 3'-overhang on the G-rich strand of telomeric DNA via telomerase  
54 or C-strand specific nucleases. Here, we discover telomerase activity is critical  
55 for efficient cell cycle progression using transient chemical inhibition by the  
56 telomerase inhibitor imetelstat. Telomerase inhibition caused changes in cell  
57 cycle kinetics and increased the proportion of cells in G2 phase, suggesting  
58 delayed clearance through this checkpoint. Investigating the possible contribution  
59 of unstructured telomere ends to these cell cycle distribution changes, we  
60 observed that imetelstat treatment induced  $\gamma$ H2AX DNA damage foci in a subset  
61 of telomerase-positive cells but not telomerase-negative primary human  
62 fibroblasts. Chromatin-immunoprecipitation with  $\gamma$ H2AX antibodies demonstrated  
63 imetelstat treatment-dependent enrichment of this DNA damage marker at  
64 telomeres. Notably, the effects of telomerase inhibition on cell cycle profile  
65 alterations were abrogated by pharmacological inhibition of the DNA-damage-  
66 repair transducer ATM. Additionally, imetelstat potentiation of etoposide, a DNA-  
67 damaging drug that acts preferentially during S/G2 phases of the cell cycle, also  
68 depended on functional ATM signaling. Our results suggest that telomerase  
69 inhibition delays the kinetics of T-loop formation in telomerase-positive cancer  
70 cells, resulting in the engagement of an ATM-dependent DNA-damage signal

71 that prevents cell cycle progression. This demonstrates for the first time that  
72 telomerase activity directly modulates the progression of the cell cycle through  
73 facilitation of T-loop formation.

74

75

76

77

78

79

80

81

82

83

84

85

86

87

88

89

90

91

92

93

94 **SIGNIFICANCE STATEMENT**

95           By forming higher-order capping structures, telomeres protect the ends of  
96 linear chromosomes from inappropriate recognition as DNA damage. An  
97 important component of this process is the formation of a 3'-overhang on the G-  
98 rich strand. This can be accomplished by the action of C-strand-specific  
99 nucleases or via telomere repeat synthesis by the telomere-maintenance enzyme  
100 telomerase. Here, using a chemical telomerase inhibitor, we demonstrate that  
101 telomerase facilitates the kinetics of telomere cap formation and passage through  
102 G2 phase. Inhibition of telomerase activity results in a prolonged ATM-dependent  
103 DNA-damage signal that alters cell cycle kinetics. Our data provide the biological  
104 rationale for exploring clinical telomerase inhibition strategies that leverage  
105 possible telomere-length-independent mechanisms of activity.

106

107

108

109

110

111

112

113

114

115

116

## 117 INTRODUCTION

118           Telomeres are nucleoprotein structures present at the ends of eukaryotic  
119 linear chromosomes. Telomeres differentiate the ends of chromosomes from  
120 random DNA breaks through the formation of capping structures called telomere  
121 loops (T-loops). These higher-order capping structures are essential for proper  
122 telomere function and cell cycle progression. In mammals, telomeres are  
123 composed of repeated sequences of (TTAGGG)<sub>n</sub> nucleotides, the  
124 complementary DNA strands, and associated proteins (1). Telomeres prevent the  
125 loss of coding DNA sequence by buffering the lagging strand gap left by the  
126 removal of RNA primers, thereby solving the “end replication problem”. Telomeric  
127 DNA loss also results from T-loop resolution, an obligatory step to provide  
128 access for DNA replication machinery. Together, these processes contribute to  
129 the loss of 50-100 base pairs of 3' terminal telomeric DNA with each replication  
130 cycle (2). This telomere attrition forms the basis of the Hayflick Limit and restricts  
131 the number of times a cell lineage may proliferate (3).

132           Telomeres are maintained by the ribonucleoprotein telomerase.  
133 Telomerase has two main components: the catalytic telomerase reverse  
134 transcriptase (TERT) and the template telomerase RNA (TER). TERT catalyzes  
135 the synthesis of the hexanucleotide repeats by reverse transcribing the RNA  
136 template sequences encoded in TER (4-7). This telomerase-mediated telomere  
137 elongation promotes immortal growth by decoupling the cell division limit from  
138 telomere length attrition.

139 TERT expression is normally repressed or only transiently activated in  
140 somatic human cells, but telomerase activation and over-expression is detected  
141 in 85-90% of human cancers (8,9). These differences make telomerase inhibition  
142 an attractive therapeutic target (1,5-7,11,12,19). One current strategy for  
143 telomerase inhibition is the drug imetelstat (GRN163L), a synthetic, lipid-  
144 conjugated, 13-mer oligonucleotide N3' P5' thiophosphoramidate complementary  
145 to the template of the TER component of telomerase (4,10,12,16-18,20). As a  
146 competitive antagonist, imetelstat blocks the normal association of TER with  
147 chromosomal ends (substrates), efficiently inhibiting *de novo* telomeric repeat  
148 synthesis.

149 During the DNA-synthesis phase of the cell cycle, the activities of multiple  
150 RecQ helicases, exonucleases, homologous recombination pathway effectors,  
151 and histone methylation enzymes are coordinated to allow DNA polymerase and  
152 telomerase (when expressed) to copy through T-loops and then restore the  
153 heterochromatin state of newly replicated telomeres (8,10-14). Defects in  
154 telomere-associated proteins involved in T-loop formation, such as helicases  
155 (BLM, RTEL1), nucleases (Apollo), or telomere factors (TRF1, TRF2), have been  
156 connected to uncapped telomeres, which can lead to cell cycle arrest and  
157 ultimately, cell senescence or apoptosis (10,12,15-18,22). Additionally, the  
158 correct rebuilding of chromosomal-end structures prior to cell division has been  
159 shown to involve the Ataxia Telangiectasia Mutated (ATM) signal transduction  
160 pathway (5-7,20,21). Activation of ATM and its associated PIKK-family member,

161 the ATM-related (ATR) kinase, is concurrent with T-loop resolution and the  
162 resulting chromosome termini exposure (8,9,11,12,19).

163         Specifically, T-loop formation requires the creation of telomeric G-rich  
164 overhangs that invade the double-stranded telomeric DNA region and form  
165 displacement loops (1,10). In primary cells, telomerase is inactive and the  
166 generation of G-rich overhangs and T-loops is dependent upon C-strand-specific  
167 nuclease activity (1,10,12,15-18). In cancer cells, telomerase expression  
168 provides another avenue for the *de novo* synthesis of G-rich telomeric DNA  
169 repeats, in addition to nuclease activity (1,10,12,15-18). However, this role of  
170 active telomerase in the kinetics of T-loop formation has been inferred from its  
171 ability to synthesize G-rich telomeric repeats but has not been demonstrated  
172 experimentally.

173         Here, we used imetelstat-induced chemical inhibition of telomerase activity  
174 to explore the role of *de novo* telomeric DNA repeat synthesis in the kinetics of T-  
175 loop formation. Since chemical inhibition is transient, we were able to study the  
176 effects of telomerase activity on structure without significant shortening of  
177 telomere length. Transient chemical inhibition also allows the immediate  
178 observation of treatment effects, thus reducing the impact of compensatory  
179 mechanisms that may confound observations.

180

## 181 **RESULTS**

182 ***Telomerase inhibition increases the proportion of cells in G2/M phases of***  
183 ***the cell cycle***

184           During normal DNA replication, DNA-damage-response (DDR) signaling is  
185 found transiently in late S/G2 phases at unstructured, open chromosome ends.  
186 These signals have been detected in the forms of ATM-MRN and ATR-ATRIP  
187 complexes (5,8,21,25,26). In order for cells to properly divide, DDR signals must  
188 first be cleared by the reformation of T-loops. To understand how telomerase  
189 may affect the kinetics of T-loop formation, we measured the effects of  
190 imetelstat-induced telomerase inhibition on cell cycle progression.

191           Cells were treated with 10  $\mu$ M inhibitory doses of imetelstat (5) or its  
192 mismatch oligo control (MM) (27) for 24 h before harvesting and staining with  
193 propidium iodide (PI) for cell cycle profiling using fluorescence-activated cell  
194 sorting (FACS). In telomerase-positive mammary adenocarcinoma (MCF-7 and  
195 MDA-MB 231) and colorectal carcinoma (HT29 and LS180) cells, a significant  
196 increase in cell populations with 4N DNA content following imetelstat but not MM  
197 treatment was observed (Fig. 1 a-d). In contrast, the cell cycle profiles of  
198 telomerase-negative transformed cells (VA-13), which maintain telomeres via the  
199 alternative lengthening of telomere (ALT) mechanism (28), and primary human  
200 foreskin fibroblasts (BJ) were unaltered by both imetelstat and MM (Fig. 1 e-f).

201           The increased 4N cell population was likely due to a delay in exit from G2  
202 phase rather than a cell cycle arrest, as previous studies have reported normal  
203 cell growth following the removal of imetelstat (5). This suggests that treated cells  
204 can return to normal cycling after the removal of drugs. To confirm the delayed  
205 exit from G2 phase, we further investigated the proliferative capacity of cells after  
206 imetelstat treatment. We used the IncuCyte Zoom live cell imaging system and



207 red fluorescent NuLight-tagged MDA-MB 231 cells to measure the effects of  
208 continuous imetelstat treatment on cell proliferation over 7 days. Consistent with  
209 a small but accumulative growth disadvantage conferred by delayed clearance  
210 from G2 phase, we observed lower nuclear counts in cells exposed to 10  $\mu$ M  
211 imetelstat compared to untreated cells (Supplementary Fig. 1 a). A lower dose of  
212 imetelstat (2  $\mu$ M) resulted in an intermediate growth effect that is in agreement  
213 with reduced inhibition of cellular telomerase activity (Supplementary Fig. 2, left  
214 panel).

215 In order to measure growth in MCF-7 cells, we used the same treatment  
216 regimen and measured absolute cell counts by Coulter counting. Similar to  
217 before, a subtle growth defect was observed in MCF-7 cells treated with 10  $\mu$ M  
218 imetelstat (Supplementary Fig. 1 b). In contrast, imetelstat had no apparent effect  
219 on cellular proliferation of telomerase-negative VA-13 cells (Supplementary Fig. 1  
220 c). Telomerase activity in MDA-MB 231, MCF-7, and HT29 cells was effectively  
221 inhibited by imetelstat in a dose-dependent manner, as confirmed by telomeric  
222 repeat amplification protocol (TRAP) assays (Supplementary Fig. 2). These  
223 results are consistent with a subtle imetelstat-induced defect in cell growth that is  
224 revealed under longer-term incubation conditions. Together, our data suggest  
225 that transient telomerase inhibition causes changes in cell cycle kinetics that  
226 result in a growth disadvantage.

227

228 ***ATM inhibition abolishes the increase in 4N DNA cells caused by imetelstat***  
229 ***treatment***

230 As ATM activation is concurrent with the resolution and rebuilding of telomere  
231 structures, we next examined whether the effects of imetelstat on cell cycle  
232 progression depend upon active ATM signaling. We applied pharmacological  
233 inhibitor order-of-addition treatment regimens using imetelstat (Im) and the  
234 specific ATM inhibitor KU55933 (Ku). The treatment conditions tested include:  
235 single drug treatments of imetelstat (Im|Im) or KU55933 (Ku|Ku) for 48 h;  
236 combinatorial treatment of imetelstat for 24 h then both imetelstat and KU55933  
237 for another 24 h (Im|Im + Ku); and combinatorial treatment of KU55933 for 24 h  
238 then both imetelstat and KU55933 for another 24 h (Ku|Im + Ku) (Fig. 2 a).

239 Consistent with Figure 1 a, imetelstat (Im|Im) treatment in MCF-7 cells  
240 increased the population of cells with 4N DNA content relative to the population  
241 distribution in untreated cells (Fig. 2 b). Notably, this effect on cell cycle  
242 progression was abrogated by KU55933 pretreatment (Ku|Im + Ku) but not by  
243 treatment with KU55933 after imetelstat exposure (Im|Im + Ku). Treatment with  
244 ATM inhibitor alone (Ku|Ku) resulted in a reduction in the cell population with 4N  
245 DNA content, but this reduction was not statistically significant in our data  
246 analysis.

247 Treatment-induced cellular toxicities can also affect cell cycle profiles. To  
248 differentiate this possibility from phase-specific cell cycle regulation, we analyzed  
249 sub-G1 populations by FACS as a functional readout of cell death at the time of  
250 DNA content analysis. The proportions of sub-G1 cell populations were not  
251 significantly affected by single imetelstat (Im|Im) and KU55933 (Ku|Ku)  
252 treatments, or by any treatment combinations, indicating that these changes in

253 cell cycle profiles were unlikely to be caused by increased rates of cell death  
254 (Fig. 2 c).

255         Additionally, we assessed whether KU55933 interfered with the efficiency  
256 of imetelstat-induced telomerase inhibition by measuring telomerase activity with  
257 TRAP. Cells pre-treated with KU55933 (Ku|Im + Ku) also showed no telomerase  
258 activity in the presence of imetelstat (Supplementary Fig. 3), confirming that ATM  
259 inhibition did not affect imetelstat's ability to completely inhibit telomerase  
260 actions. Together, these results imply that cell cycle alterations caused by  
261 imetelstat-induced telomerase inhibition are dependent on functional ATM  
262 signaling.

263

264 ***Imetelstat treatment induces telomere-specific DNA damage foci during the***  
265 ***G2 phase of telomerase-positive cells***

266         In the absence of proper T-loop formation, uncapped telomeres are  
267 recognized as DNA damage and accumulate DNA damage foci. The formation of  
268 these damage foci is primarily mediated through the actions of ATM (26). To  
269 confirm telomerase is involved in the normal kinetics of T-loop formation, we  
270 examined the delayed clearance of ATM-induced DDR signals following  
271 imetelstat treatment. Immunocytochemistry and confocal microscopy were used  
272 to visualize the DDR marker  $\gamma$ H2AX (Ser139), a standard marker of uncapped or  
273 dysfunctional telomeres (1,20,21,25,26).

274         Imetelstat treatment over 24 h increased the number of cells with  $\gamma$ H2AX  
275 DDR foci in a subset of telomerase-positive MCF-7 and HT29 cells (Fig. 3 a-d)

276 but not telomerase-negative primary human BJ fibroblasts (Fig. 3 e-f). In parallel,  
277 the mismatch oligo control had no significant effect on  $\gamma$ H2AX DDR foci  
278 accumulation. The observed increase in foci was not due to increased non-  
279 specific background labeling in imetelstat-treated cells as illustrated by the  
280 secondary antibody-alone controls (Supplementary Fig. 4).

281 To confirm the telomeric origin of imetelstat-induced  $\gamma$ H2AX DDR foci, we  
282 performed chromatin-immunoprecipitation using anti-  $\gamma$ H2AX antibody. In  
283 agreement with our immunocytochemistry observations, we confirmed increased  
284  $\gamma$ H2AX ChIP signals following 24h imetelstat and etoposide treatments, but not  
285 after treatments with the mismatch oligo, or vehicle control (Fig. 3 g-i).

286 Quantitative PCR measurements of  $\gamma$ H2AX ChIP signals showed enrichment of  
287 telomeric sequence following both imetelstat and etoposide treatments (Fig. 3 g).  
288 In contrast,  $\gamma$ H2AX signal enrichment at Alu-repeat sequence was only observed  
289 with etoposide treatments (Fig. 3 h). When  $\gamma$ H2AX signal enrichment at telomere  
290 was normalized to the signals measured with the Alu-repeat reference, the  
291 imetelstat group significantly different from the other three treatment groups,  
292 suggesting that imetelstat induced the formation of telomere-specific  $\gamma$ H2AX loci  
293 (Fig. 3 i). This accumulation of  $\gamma$ H2AX DDR foci at telomeres following imetelstat  
294 treatment is consistent with an increase in uncapped telomeres caused by the  
295 absence or inhibition of telomerase activity.

296 In order to assess the distribution of  $\gamma$ H2AX DDR foci-positive cell  
297 populations and their corresponding cell cycle phase, using  
298 immunohistochemistry, we co-labeled imetelstat-treated MCF-7 and HT29 cells

299 with DDR and cell cycle phase markers. Since  $\gamma$ H2AX DDR foci-positive cells co-  
300 labeled with cytoplasmic cyclin B1, a marker of late S/G2 phases (Fig. 4 a-d), but  
301 not phospho-histone H3 (H3P), an M phase marker in MCF-7 cells (Fig. 4 e-f),  
302 the  $\gamma$ H2AX DDR foci-positive cells were concluded to be residing in the S/G2  
303 phases.

304 Consistent with the immunocytochemistry data, FACS measurements  
305 showed the proportion of MCF-7 cells that were both cyclin B1-positive and  
306 contained 4N DNA content increased with imetelstat treatment, relative to no  
307 drug treatment and/or mismatch oligo controls (Fig. 4 g-h). Considering that the  
308 magnitude of this increase was small, a delayed clearance from, rather than a  
309 complete arrest at, G2 phase was more likely. Overall, our data indicate that  
310 imetelstat-induced telomerase inhibition correlates with an accumulation of DDR  
311 marker  $\gamma$ H2AX and a delayed clearance of the telomere checkpoint at G2 phase  
312 of the cell cycle.

313

314 ***Transient telomerase inhibition-induced DDR foci formation depends upon***  
315 ***active ATM signaling***

316 Imetelstat was observed to delay G2 checkpoint clearance in an ATM-  
317 activity dependent manner. To connect the role of ATM in G2 checkpoint  
318 regulation with imetelstat-dependent  $\gamma$ H2AX DDR foci formation, we again used  
319 our order-of-addition experimental scheme coupled with immunofluorescent  
320 detection of DDR signals. MCF-7 cells were treated with KU55933 and imetelstat  
321 for 48 h, either alone or in different combinations, and  $\gamma$ H2AX DDR foci were

322 quantified. As in our previous experiments, imetelstat treatment (Im|Im) resulted  
323 in an increase in  $\gamma$ H2AX DDR foci relative to the untreated (NT) negative control  
324 (Fig. 5 a-b). Also as expected, we observed that treatment with KU55933 alone  
325 (Ku|Ku) or before imetelstat addition (Ku|Im + Ku) abolished  $\gamma$ H2AX DDR foci  
326 formation. Interestingly, treatment with KU55933 after 24 h incubation with  
327 imetelstat (Im|Im + Ku) only showed a slight, but not statistically significant,  
328 reduction in  $\gamma$ H2AX DDR foci formation. It is conceivable that blocking the activity  
329 of ATM prevents the phosphorylation and propagation of new  $\gamma$ H2AX foci but  
330 does not remove the phosphorylated proteins that have already formed (Fig. 5 a-  
331 b).

332 To provide further insight into the fate of imetelstat-treated cells that  
333 escape G2-stalling, we labeled cells from different treatment groups for phospho-  
334 histone H3P and quantified the proportion of cells progressing to M phase (Fig. 5  
335 a, c). When no drug treatment was administered, ~5% of MCF-7 cells were H3P-  
336 positive. Treatment with imetelstat alone (Im|Im) decreased the proportion of  
337 cells in M phase, consistent with a stall at the G2 checkpoint due to persistent  
338 DDR signaling. In contrast, cells treated with imetelstat and then KU55933 (Im|Im  
339 + Ku) showed an increase in the proportion of cells in M phase, suggesting that  
340 continuous ATM signaling is essential for the G2 stall caused by imetelstat-  
341 induced DDR signaling. Blocking ATM signaling following transient telomerase  
342 inhibition likely released MCF-7 cells from the G2 checkpoint and allowed  
343 progression to the next phase of the cell cycle. This release of previously stalled  
344 cells manifested as an increase in cells entering M phase.

345            Similar to continuous imetelstat treatment, treatment with KU55933 alone  
346 (Ku|Ku) or prior to imetelstat addition (Ku|Im + Ku) reduced the number of M-  
347 phase cells, suggesting that the order of ATM and telomerase inhibition is  
348 important. Consistent with the relative decrease in 4N DNA cell populations  
349 observed in our earlier FACS experiments (Fig. 2 b), ATM inhibition may induce  
350 faster passage through G2/M phases using multiple parallel mechanisms (see  
351 discussion) such that the effects of telomerase inhibition are masked. Our data  
352 demonstrate that ATM inhibition before imetelstat treatment removed the effects  
353 of telomerase-inhibition–induced G2 stalling, confirming that functional ATM  
354 activity is essential for the telomere checkpoint.

355

356 ***Imetelstat potentiation of etoposide cytotoxicity depends upon active ATM***  
357 ***signaling***

358            Previously, we observed that imetelstat potentiated the cytotoxicity of  
359 S/G2-specific DNA-damaging agents, including the topoisomerase inhibitors  
360 etoposide and irinotecan (5). Addition of ATM inhibitor KU55933 following 24 h of  
361 imetelstat treatment (Im|Im + Ku) further increased the cytotoxicity of etoposide.  
362 However, the cytotoxic effects from inhibition of ATM signaling before imetelstat  
363 treatment (Ku|Im + Ku) were not tested in this previous study. To clarify the role  
364 of ATM signaling in imetelstat-induced potentiation of etoposide cytotoxicity, we  
365 again performed order-of-addition treatment experiments using the colony  
366 forming unit assay (5-7,12,16). MCF-7 cells were pre-treated for 24 h with  
367 imetelstat or KU55933 before the addition of etoposide with continued inhibitor

368 treatment or in combination with both imetelstat and KU55933 for 24 h. After 48 h  
369 of treatment, cells were harvested and set in soft agar medium to recover for 2  
370 weeks (Fig. 6 a).

371 In agreement with previous results, imetelstat (Im|Im) or KU55933 (Ku|Ku)  
372 treatment alone significantly potentiated etoposide cytotoxicity in MCF-7 cells  
373 (Fig. 6 b-c) (5,10-14,29). ATM inhibition consistently resulted in greater  
374 potentiation of etoposide cytotoxicity than imetelstat-induced telomerase  
375 inhibition alone. This observation was attributed to the broader role of ATM in  
376 signal transduction regulation of cellular responses to double-strand DNA  
377 damage (30), in addition to its role in telomere maintenance and structural  
378 homeostasis.

379 Consistent with our previous data, an additive effect on etoposide  
380 cytotoxicity was observed when the cells were treated with both inhibitors in  
381 combination following imetelstat pre-treatment (Im|Im + Ku). In contrast, the  
382 additive effect was lost when cells were pre-treated with KU55933 before  
383 imetelstat and KU55933 addition (Ku|Im +Ku). These observations suggest that  
384 functional ATM-dependent DDR signaling is required for the potentiation of  
385 etoposide cytotoxicity by telomerase inhibition.

386 Notably, the rank order of treatment conditions leading to increased  
387 sensitivities towards etoposide mirrors the rank order of treatment conditions  
388 leading to increased DDR foci accumulation observed in our previous FACS  
389 experiments. The most cytotoxic treatment condition (Im|Im + Ku) was also  
390 observed to increase the proportion of cells in M phase in our previous ICC



391 experiments. Based on these observations, we reasoned that the increased  
392 cytotoxicity might be linked to increased mitotic errors caused by the premature  
393 release of chromosomes with unstructured telomeres from the G2 checkpoint.  
394 Consistent with improperly capped telomeres proceeding to mitosis, following  
395 treatment (Im|Im + Ku), we observed an increase in micronuclei formation that  
396 indicated mitotic defects and increased genomic instability (Fig. 6 d-e). This  
397 increase in the number of cells with mitotic defects acts as an additional cytotoxic  
398 mechanism in etoposide-treated MCF-7 cells.

399

## 400 **DISCUSSION**

### 401 ***TERT addiction manifests as a kinetic advantage in cell cycle progression***

402 The role of telomerase in telomeric chromatin formation is inferred through  
403 its *de novo* telomere synthesis function but has never been directly  
404 demonstrated. Our data suggest that telomerase improves the kinetics of G-rich  
405 overhang formation and thus, facilitates efficient higher-order telomeric chromatin  
406 formation and clearance from the G2 checkpoint.

407 In telomerase-positive cells, imetelstat blocks the access of reverse  
408 transcriptase to its telomeric DNA substrate, thereby preventing *de novo*  
409 synthesis of G-rich telomere repeats (10,12,15-18,20,31). Consequently, ATM-  
410 mediated DDR signals at unstructured telomeres take longer to resolve. This  
411 results in delayed passage through cell cycle checkpoints and a temporary  
412 accumulation of cells in G2 phase.

413           The lack of telomerase action stalls but does not entirely arrest cells at G2  
414 phase because G-rich overhangs for T-loop formation can still be produced,  
415 albeit with reduced efficiency, through the actions of multiple nucleases  
416 (11,12,16,19,32). In the absence of G-strand synthesis, Exo1 provides more  
417 substantial resection for T-loop formation. However, nuclease recruitment and  
418 processing may have slower kinetics than telomere repeat synthesis (10,15).  
419 Therefore, the inhibition of telomerase will delay, but not stop, the progression of  
420 the cell cycle.

421           The observation that telomerase improves the kinetics of T-loop formation  
422 is consistent with previous work from our laboratory showing that overexpression  
423 of telomerase in telomerase-negative ALT cells conferred a growth advantage  
424 and faster passage through S/G2 phases of the cell cycle (20,21,30,33). This  
425 selective growth advantage may cause cancer cells to become “addicted” to  
426 telomerase activity and explain the preponderance of telomerase overexpression  
427 (>85%) for telomere maintenance over the alternate lengthening of telomere  
428 mechanism in surveyed cancers (28).

429           As telomerase-negative cells reform T-loops using C-strand-specific  
430 nucleases, their cell cycle progression is predicted to be unaltered by imetelstat  
431 treatment (5,7,8,15,21,25,26). This prediction is supported by the lack of  
432 significant decreases in cell growth in imetelstat-treated telomerase-negative cell  
433 lines (Supplementary Fig. 1 c). Therefore, somatic tissues with low telomerase  
434 expression are also predicted to have tolerable clinical toxicity profiles for  
435 telomerase inhibition by imetelstat (1,5-7,20).

436 ***ATM signaling is necessary for telomerase actions at the T-loop***

437           Functional ATM is required for normal elongation of telomeres by  
438 telomerase in human cells (5,10-14,23,24,34). ATM inhibition prior to imetelstat  
439 treatment abolishes the delay in cell cycle progression induced by telomerase  
440 inhibition. This observation may be due to the inhibition of telomerase recruitment  
441 to the telomere in the absence of ATM activity (22) or the inhibition of a  
442 telomerase-independent ATM function that leads to changes in G2 checkpoint  
443 engagement (35).

444           Notably, ATM inhibition was previously shown to accelerate passage  
445 through G2 phase by the removal of inhibitory phosphorylation of C-strand-  
446 specific Exo1 nuclease (31). Increased Exo1 activity leads to faster G-rich  
447 overhang formation and thus, increases the kinetics of T-loop formation in the  
448 absence of telomerase actions. Accordingly, accelerated G2/M progression is  
449 consistent with the observed trend of reduced populations of cells with 4N DNA  
450 content following KU55933 treatment (Fig. 2 b).

451           Interestingly, reversal of the order of inhibitor addition, with the addition of  
452 imetelstat before ATM inhibition, resulted in increases in M-phase cell  
453 populations. This suggests that the ATM-dependent telomere checkpoint was  
454 quickly engaged following telomerase inhibition. Subsequent ATM inhibition  
455 released previously stalled cells from G2 phase to M phase, confirming that  
456 continuous ATM signaling is crucial for the maintenance of this checkpoint (36).  
457 In M phase, uncapped chromosome ends resulted in abnormal cell division  
458 and/or mitotic catastrophe (Fig. 6 d-e). The higher levels of micronuclei formation

459 indicate possible mitotic defects and chromosomal instability due to errors in  
460 telomere processing.

461

### 462 ***Therapeutic implications of short-term telomerase inhibition***

463       Previous work in our laboratory demonstrated that combining telomerase  
464 inhibition by imetelstat with genotoxic agents potentiated the cytotoxic effects of  
465 G2-specific DNA-damaging agents such as topoisomerase inhibitors (5,11,12).  
466 Data from our current study indicate that this potentiating effect is likely due to an  
467 ATM-dependent DNA-damage signal induced by telomerase inhibition. The  
468 sustained DDR signal at unstructured chromosome ends may act in an additive  
469 manner with G2-specific DNA-damaging agents such that a greater proportion of  
470 cells pass the apoptotic threshold. Our hypothesis is supported by previous  
471 observations that telomerase depletion in yeast caused chronic replication stress  
472 and stalled replication forks (32). In this context, topoisomerase inhibitors and  
473 other drugs that cause replicative stress may synergize particularly well with  
474 imetelstat.

475       The potentiation of topoisomerase inhibitors by imetelstat may also be due  
476 to pharmacodynamic interactions between telomerase inhibition and  
477 topoisomerase inhibition. As previously observed, proper T-loop formation may  
478 involve topoisomerase activity (7). The loss of telomerase activity in combination  
479 with the absence of topology relief may further damage telomere structures and  
480 result in cytotoxicity responses, thus providing another mechanism by which  
481 imetelstat can potentiate topoisomerase inhibitor cytotoxicity.

482 In order for telomeres to shorten significantly, multiple rounds of cellular  
483 replication are required. The long lag time associated with telomere shortening  
484 has been a major theoretical barrier to the utilization of telomerase inhibitors for  
485 anti-cancer chemotherapy (1). Recent clinical trials of imetelstat in myelofibrosis  
486 and thrombocytopenia have cast doubt on this premise. Telomere length did not  
487 change in response to therapy and baseline telomere length was not predictive of  
488 a positive therapeutic response (8,23,37). In this context, our data provide an  
489 alternate explanation for the observed clinical effects of imetelstat: telomerase  
490 inhibition in these hematopoietic cell types may induce distortions in cell cycle  
491 kinetics without parallel observable effects on telomere-length regulation.

492 Telomeric-DNA-replication stress due to telomerase inhibition may be  
493 partially relieved by an increase in the dNTP (purine) pool, as suggested in  
494 previous studies (6,7,32). However, hematopoietic cancers frequently display  
495 dysregulated dNTP metabolism (10,11,13,14,38). Therefore, this model predicts  
496 that existing therapeutic agents targeting the available dNTP pools, such as  
497 mycophenolic acids, will have synergistic effects with imetelstat treatments in  
498 vulnerable hematopoietic cell types.

499 We observed that transient telomerase inhibition by imetelstat altered the  
500 kinetics of T-loop formation through the engagement of the G2 checkpoint.  
501 Imetelstat also sensitized telomerase-positive cells to G2-specific DNA-damaging  
502 agents through delayed resolution of an ATM-dependent DNA-damage signal.  
503 These observations allude to a separate mechanism by which telomerase  
504 inhibition could affect telomere-maintenance kinetics and homeostasis. Our data

505 is relevant for understanding the role of telomerase in the formation of higher-  
506 order telomeric-chromatin structures and cell cycle progression, thereby  
507 presenting new testable hypotheses and possibilities for combination drug  
508 regimens.

509

## 510 **MATERIALS AND METHODS**

### 511 **Cell lines and reagents**

512 MCF-7, MDA-MB 231, HT29, LS180, BJ fibroblasts, and WI-38 VA-13  
513 were obtained from the American Type Culture Collection (ATCC). MDA-MB 231  
514 (NucLight Red) cells were obtained from Essen Bioscience. Cell culture media,  
515 antibiotics, and other cell culture reagents were purchased from Invitrogen/Life  
516 Technologies unless otherwise noted. Cells were maintained under standard  
517 culture conditions of 37°C and 5% CO<sub>2</sub> with penicillin and streptomycin antibiotics  
518 (100 U each) and in the presence of appropriate fetal bovine serum (FBS)  
519 concentrations (5-15%), as indicated by the ATCC.

520 Etoposide (Sigma/Aldrich) was administered in dose-response treatments  
521 in 2-fold serial dilution and a maximum dose of 10uM. ATM inhibitor KU55933  
522 (Calbiochem) was administered as 10 μM in DMSO, a concentration previously  
523 determined to efficiently inhibit ATM function (5,21,25). Imetelstat and its  
524 mismatch oligo control (MM) were obtained from Geron, resuspended in PBS,  
525 and stored at -20°C. Stock concentrations were determined before each  
526 experiment using UV-spectrophotometer absorbance. Imetelstat and MM were

527 administered at 10  $\mu$ M, a dose previously determined to inhibit telomerase  
528 activity by >100 fold in multiple cancer cell types (5).

529

### 530 **Colony forming unit assay (CFU)**

531 The assay was performed as previously described (1,5). Cells were seeded and  
532 allowed to grow into individual colonies at 37°C under 5% CO<sub>2</sub> for 2 weeks.

533 Colonies were counted as positive if colony sizes exceeded 50  $\mu$ m. Dose-  
534 response analysis was performed using GraphPad Prism (v6.0b).

535

### 536 **Immunocytochemistry (ICC)**

537 Labeling was conducted as previously described (5,23,24). Primary antibodies  
538 were sourced and diluted as follows: anti-phospho-histone H2AX (Ser139) 1:500  
539 (JBW301 EMD Millipore), phospho-H3 1:500 (06-570 EMD Millipore), and cyclin  
540 B1 1:100 (Santa Cruz H-433). Images were collected using a Zeiss LSM 700  
541 confocal microscope and Zen 2012 (Zeiss) software. To quantify DNA-damage  
542 response foci, the collected images were blinded and scored with >400 cells  
543 analyzed for each condition. Nuclear abnormality scoring was conducted as  
544 previously described (39).

545

### 546 **Fluorescence-activated cell sorting (FACS)**

547 Cells were plated and allowed to settle before treatment for 24 to 48 h with the  
548 described drug regimens. The treated cells were harvested by trypsinization and  
549 fixed with ethanol. FITC-Anti-Cyclin B1 (BD Biosciences) immunolabeling and

550 propidium iodide nucleic acid labeling were conducted according to the  
551 manufacturer's protocol (Becton Dickinson). RNase treatment was used to  
552 remove non-specific signals. Labeled cells were sorted using a BD LSRII flow  
553 cytometer (UBC Life Sciences Institute). For each cell sample, a minimum of  
554 10,000 events were recorded. Flow Jo (Tree Star Inc) software and standard  
555 gating procedures were used to quantify the sub-G1 population and the number  
556 of cells with 2N and 4N DNA content.

557

### 558 **Chromatin-immunoprecipitation (ChIP)**

559 Cells were plated in 10 cm plates and allowed to settle before treatment for 24 h  
560 with the described drug regimens. The treated cells were PBS-washed and  
561 cross-linked in 1% formaldehyde. Cross-linked samples were collected by  
562 scraping in ChIP lysis buffer (20 mM Tris-HCl pH 8.0, 140 mM NaCl, 1 mM EDTA  
563 pH 8.0, 1% Triton X-100, 0.1% SDS, 1X protease inhibitor cocktail) and  
564 sonicated with a Covaris m220 ultrasonicator. The sonicated fractions were then  
565 precleared with Protein G sepharose beads (GE Healthcare, #17-0618) and then  
566 subjected to immunoprecipitation (IP) with 3 µg of anti-phospho-Histone H2A.X  
567 (Millipore 05-636). IP with 30 µL of BSA-preblocked protein G beads (without  
568 primary antibody) was used as control. Chromatin immunoprecipitates were  
569 washed sequentially in ChIP Wash Buffer A (0.1% SDS, 1% Triton X-100, 2 mM  
570 EDTA, 20 mM Tris-HCl pH 8.0, 150 mM NaCl), ChIP Wash Buffer B (0.1% SDS,  
571 1% Triton X-100, 2 mM EDTA, 20 mM Tris-HCl pH 8.0, 500 mM NaCl), ChIP  
572 Wash Buffer C (0.25 M LiCl, 1% NP-40, 1% Sodium Deoxycholate, 1 mM EDTA,



573 10 mM Tris-HCl pH 8.0), and lastly TE buffer. The ChIP samples were reversed  
574 cross-linked overnight in 65°C, and extracted DNA was purified with a DNA  
575 cleanup kit (BioBasic). Quantitative PCR was performed using a Tel1b (telomere  
576 sequence) primer set (Forward:  
577 CGGTTTGTTTGGGTTTGGGTTTGGGTTTGGGTTTGGGTT, Reverse:  
578 GGCTTGCCTTACCCTTACCCTTACCCTTACCCTTACCCT) and an Alu repeat  
579 reference primer set (Forward: GACCATCCCGGCTAAAACG, Reverse:  
580 CGGGTTCACGCCATTCTC) (40).

581

## 582 **Data analysis**

583 GraphPad Prism version 6 (GraphPad Software Inc, San Diego, CA) was used  
584 for statistical analysis and data presentation. Student's *t*-tests or, where  
585 appropriate, ANOVA followed by Fisher's LSD test were used to generate P-  
586 values.  $P < 0.05$  was considered statistically significant.

587

## 588 **ACKNOWLEDGEMENTS**

589 We thank Geron Corporation for the gift of imetelstat. We appreciate assistance  
590 from Arthur Chen for quantifying the ICC images, Andy Johnson for FACS use  
591 and analysis, and JiaLin Xu for technical help with TRAP experiments. Anna  
592 Krassowska, Neeru Batra from Geron, and members of the Wong Lab are  
593 thanked for critically reading the manuscript.

594

595

596 **REFERENCES**

597

- 598 1. Shay JW. Role of Telomeres and Telomerase in Aging and Cancer.  
599 Cancer Discov. 2016 Jun;6(6):584–93.
- 600 2. Hukezalie KR, Wong JM. Structure-Function Relationship and Biogenesis  
601 Regulation of the Human Telomerase Holoenzyme. FEBS J. 2013 Apr 3.
- 602 3. Shay JW, Wright WE. Hayflick, his limit, and cellular ageing. Nat. Rev. Mol.  
603 Cell Biol. 2000 Oct;1(1):72-6.
- 604 4. Shay JW, Wright WE. Role of telomeres and telomerase in cancer. Semin.  
605 Cancer Biol. 2011 Dec;21(6):349–53.
- 606 5. Tamakawa RA, Fleisig HB, Wong JMY. Telomerase inhibition potentiates  
607 the effects of genotoxic agents in breast and colorectal cancer cells in a  
608 cell cycle-specific manner. Cancer Res. 2010 Nov 1;70(21):8684–94.
- 609 6. Martínez P, Blasco MA. Telomeric and extra-telomeric roles for telomerase  
610 and the telomere-binding proteins. Nat. Rev. Cancer. 2011 Mar;11(3):161–  
611 76.
- 612 7. Giraud-Panis M-J, Pisano S, Benarroch-Popivker D, Pei B, Le Du M-H,  
613 Gilson E. One identity or more for telomeres? Front Oncol. 2013;3:48.
- 614 8. Wong JMY, Collins K. Telomere maintenance and disease. Lancet. 2003  
615 Sep 20;362(9388):983–8.
- 616 9. Shay JW, Bacchetti S. A survey of telomerase activity in human cancer.  
617 Eur. J. Cancer. 1997 Apr;33(5):787–91.
- 618 10. Lenain C, Bauwens S, Amiard S, Brunori M, Giraud-Panis M-J, Gilson E.  
619 The Apollo 5' exonuclease functions together with TRF2 to protect  
620 telomeres from DNA repair. Curr. Biol. 2006 Jul 11;16(13):1303–10.
- 621 11. García-Cao M, O'Sullivan R, Peters AHFM, Jenuwein T, Blasco MA.  
622 Epigenetic regulation of telomere length in mammalian cells by the  
623 Suv39h1 and Suv39h2 histone methyltransferases. Nat. Genet. 2004  
624 Jan;36(1):94–9.
- 625 12. Arnoult N, Karlseder J. Complex interactions between the DNA-damage  
626 response and mammalian telomeres. Nat. Struct. Mol. Biol. 2015  
627 Nov;22(11):859–66.
- 628 13. Collins K. The biogenesis and regulation of telomerase holoenzymes. Nat.  
629 Rev. Mol. Cell Biol. 2006 Jul;7(7):484–94.
- 630 14. Chan SS, Chang S. Defending the end zone: studying the players involved

- 631 in protecting chromosome ends. *FEBS Lett.* 2010 Sep 10;584(17):3773–8.
- 632 15. Wu P, Takai H, de Lange T. Telomeric 3' overhangs derive from resection  
633 by Exo1 and Apollo and fill-in by POT1b-associated CST. *Cell.* 2012 Jul  
634 6;150(1):39–52.
- 635 16. Martínez P, Blasco MA. Replicating through telomeres: a means to an end.  
636 *Trends Biochem. Sci.* 2015 Sep;40(9):504–15.
- 637 17. Zhong FL, Batista LFZ, Freund A, Pech MF, Venteicher AS, Artandi SE.  
638 TPP1 OB-fold domain controls telomere maintenance by recruiting  
639 telomerase to chromosome ends. *Cell.* 2012 Aug 3;150(3):481–94.
- 640 18. Nandakumar J, Cech TR. Finding the end: recruitment of telomerase to  
641 telomeres. *Nat. Rev. Mol. Cell Biol.* 2013 Feb;14(2):69–82.
- 642 19. Kibe T, Zimmermann M, de Lange T. TPP1 Blocks an ATR-Mediated  
643 Resection Mechanism at Telomeres. *Mol. Cell.* 2016 Jan 21;61(2):236–46.
- 644 20. Herbert B-S, Gellert GC, Hochreiter A, Pongracz K, Wright WE, Zielinska  
645 D, et al. Lipid modification of GRN163, an N3“-->P5” thio-phosphoramidate  
646 oligonucleotide, enhances the potency of telomerase inhibition. *Oncogene.*  
647 2005 Aug 4;24(33):5262–8.
- 648 21. Verdun RE, Karlseder J. The DNA damage machinery and homologous  
649 recombination pathway act consecutively to protect human telomeres. *Cell.*  
650 2006 Nov 17;127(4):709–20.
- 651 22. Tong AS, Stern JL, Sfeir A, Kartawinata M, de Lange T, Zhu X-D, et al.  
652 ATM and ATR Signaling Regulate the Recruitment of Human Telomerase  
653 to Telomeres. *Cell Rep.* 2015 Nov 24;13(8):1633–46.
- 654 23. Tefferi A, Lasho TL, Begna KH, Patnaik MM, Zblewski DL, Finke CM, et al.  
655 A Pilot Study of the Telomerase Inhibitor Imetelstat for Myelofibrosis. *N.*  
656 *Engl. J. Med.* 2015 Sep 3;373(10):908–19.
- 657 24. Jafri MA, Ansari SA, Alqahtani MH, Shay JW. Roles of telomeres and  
658 telomerase in cancer, and advances in telomerase-targeted therapies.  
659 *Genome Med.* 2016;8(1):69.
- 660 25. Verdun RE, Crabbe L, Haggblom C, Karlseder J. Functional human  
661 telomeres are recognized as DNA damage in G2 of the cell cycle. *Mol.*  
662 *Cell.* 2005 Nov 23;20(4):551–61.
- 663 26. Takai H, Smogorzewska A, de Lange T. DNA damage foci at dysfunctional  
664 telomeres. *Curr. Biol.* 2003 Sep 2;13(17):1549–56.
- 665 27. Asai A, Oshima Y, Yamamoto Y, Uochi TA, Kusaka H, Akinaga S,

- 666 Yamashita Y, Pongracz K, Pruzan R, Wunder E, Piatyszek M, Li S, Chin  
667 AC, Harley CB, Gryaznov S. A novel telomerase template antagonist  
668 (GRN163) as a potential anticancer agent. *Cancer Res* 2003 Jul  
669 15;63(14):3931–9.
- 670 28. Bryan TM, Englezou A, Dalla-Pozza L, Dunham MA, Reddel RR. Evidence  
671 for an alternative mechanism for maintaining telomere length in human  
672 tumors and tumor-derived cell lines. *Nat. Med.* 1997 Nov;3(11):1271–4.),
- 673 29. Fleisig HB, Wong JMY. Telomerase promotes efficient cell cycle kinetics  
674 and confers growth advantage to telomerase-negative transformed human  
675 cells. *Oncogene*. 2012 Feb 23;31(8):954–65.
- 676 30. Shiloh Y, Ziv Y. The ATM protein kinase: regulating the cellular response to  
677 genotoxic stress, and more. *Nat. Rev. Mol. Cell Biol.* 2013 Apr;14(4):197-  
678 210.
- 679 31. Bolderson E, Tomimatsu N, Richard DJ, Boucher D, Kumar R, Pandita TK,  
680 et al. Phosphorylation of Exo1 modulates homologous recombination repair  
681 of DNA double-strand breaks. *Nucleic Acids Res.* 2010 Apr;38(6):1821–31.
- 682 32. Xie Z, Jay KA, Smith DL, Zhang Y, Liu Z, Zheng J, et al. Early telomerase  
683 inactivation accelerates aging independently of telomere length. *Cell.* 2015  
684 Feb 26;160(5):928–39.
- 685 33. Burgess DJ, Doles J, Zender L, Xue W, Ma B, McCombie WR, et al.  
686 Topoisomerase levels determine chemotherapy response in vitro and in  
687 vivo. *Proc. Natl. Acad. Sci. U.S.A.* 2008 Jul 1;105(26):9053–8.
- 688 34. Lee SS, Bohrson C, Pike AM, Wheelan SJ, Greider CW. ATM Kinase Is  
689 Required for Telomere Elongation in Mouse and Human Cells. *Cell Rep.*  
690 2015 Nov 24;13(8):1623–32.
- 691 35. Blasina A, Price BD, Turenne GA, McGowan CH. Caffeine inhibits the  
692 checkpoint kinase ATM. *Curr. Biol.* 1999 Oct 7;9(19):1135-8.
- 693 36. Shibata A, Barton O, Noon AT, Dahm K, Deckbar D, Goodarzi AA, et al.  
694 Role of ATM and the damage response mediator proteins 53BP1 and  
695 MDC1 in the maintenance of G(2)/M checkpoint arrest. *Mol. Cell. Biol.*  
696 2010 Jul;30(13):3371–83.
- 697 37. Baerlocher GM, Oppliger Leibundgut E, Ottmann OG, Spitzer G, Odenike  
698 O, McDevitt MA, et al. Telomerase Inhibitor Imetelstat in Patients with  
699 Essential Thrombocythemia. *N. Engl. J. Med.* 2015 Sep 3;373(10):920–8.
- 700 38. Kohnken R, Kodigepalli KM, Wu L. Regulation of deoxynucleotide  
701 metabolism in cancer: novel mechanisms and therapeutic implications.  
702 *Mol. Cancer.* 2015;14:176.

- 703 39. Fleisig HB, Hukezalie KR, Thompson CAH, Au-Yeung TTT, Ludlow AT,  
704 Zhao CR, et al. Telomerase reverse transcriptase expression protects  
705 transformed human cells against DNA-damaging agents, and increases  
706 tolerance to chromosomal instability. *Oncogene*. 2016 Jan 14;35(2):218–  
707 27.
- 708 40. Keefe D, Wang F, Robinson LG, Pan XV, Weissman SM, Liu L, Kalmbach  
709 KH. Measurement of telomere length at the single cell level. *Protoc. Exch.*  
710 2017 Jan 5.
- 711
- 712
- 713
- 714
- 715
- 716
- 717

718 **FIGURES**

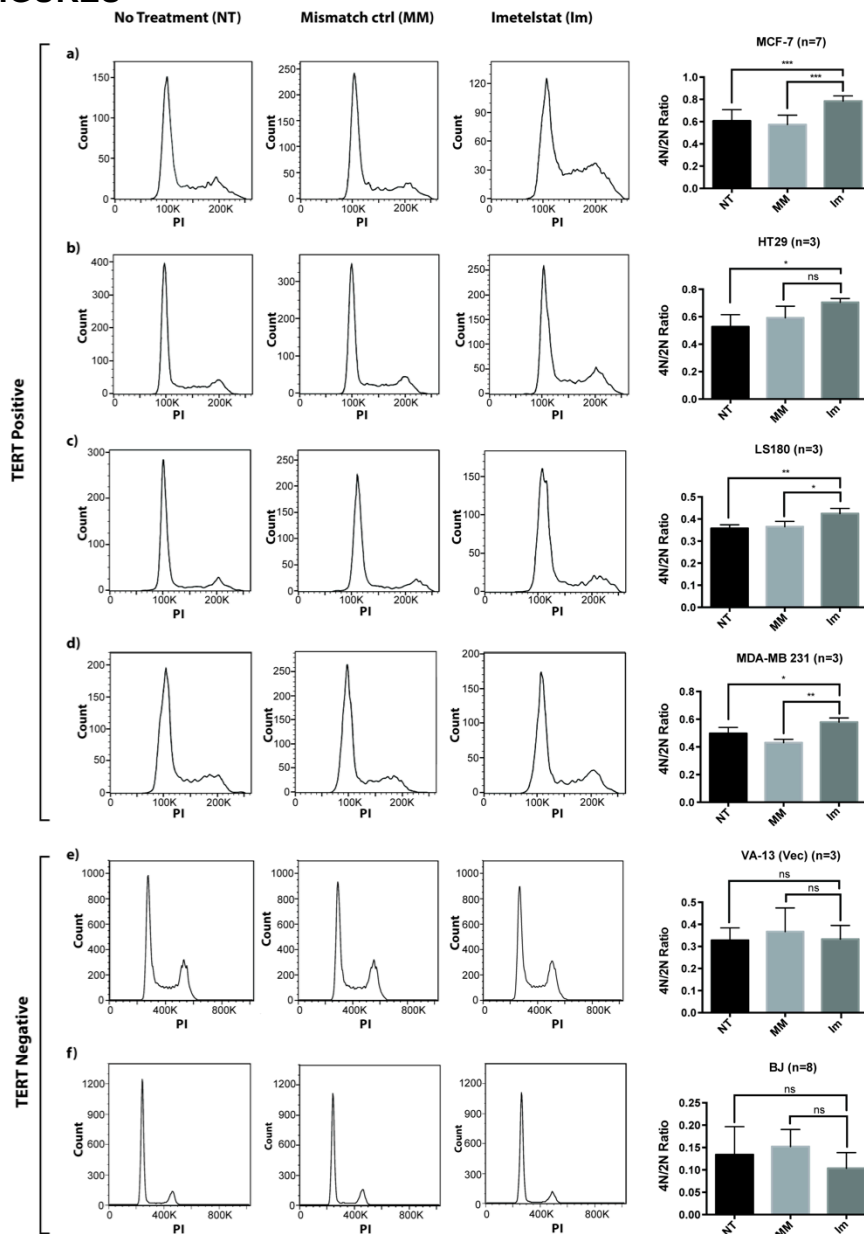

719

720 **Figure 1. Telomerase inhibition increases the proportion of telomerase-**  
 721 **positive cells with 4N DNA content.** Cells were treated for 24 h with 10  $\mu$ M  
 722 imetelstat (Im) or its mismatch oligo control (MM). DNA content was analyzed  
 723 using FACS and gating single cells by propidium iodide (PI) staining.  
 724 Representative cell cycle profiles are shown for the indicated treatments and cell  
 725 lines. (a-d) Imetelstat-induced telomerase inhibition increased the ratio of 4N to  
 726 2N cells in MCF-7, HT29, LS180, and MDA-MB 231 cell lines. (e-f) No change in  
 727 ratio was observed in telomerase-negative VA-13 and BJ cell lines. ANOVA and  
 728 Fisher's LSD test were used to generate P-values (\* =  $P \leq 0.05$ , \*\* =  $P \leq 0.01$ , \*\*\*  
 729 =  $P \leq 0.001$ ). Error bars represent SD.

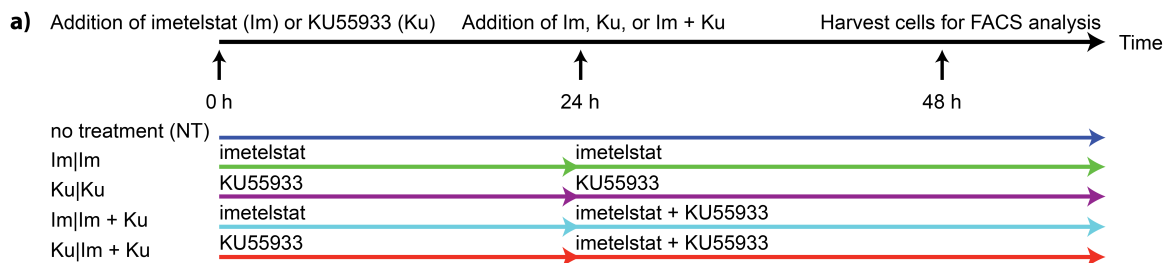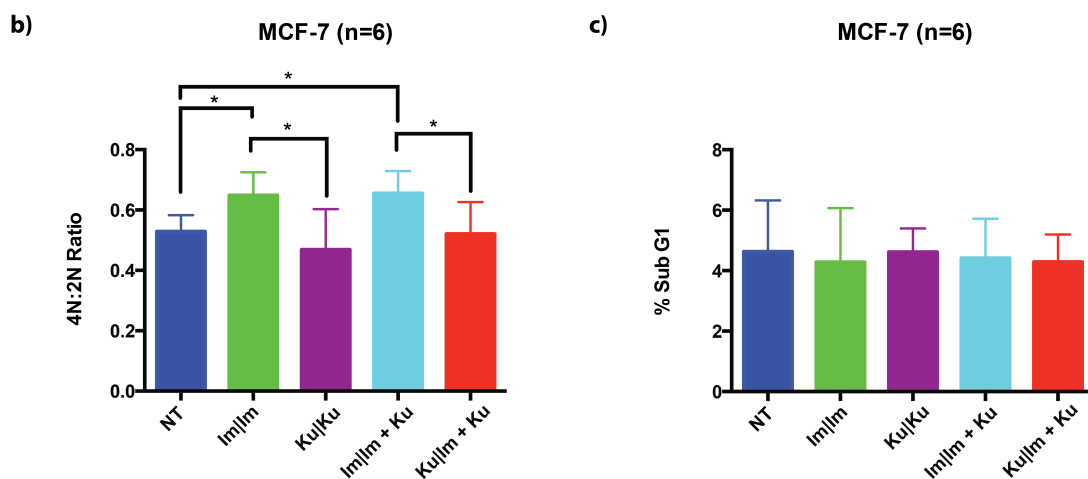

730

731

732

**Figure 2. KU55933 and imetelstat affects cell cycle population distribution.**

733

(a) MCF-7 cells were treated with the indicated inhibitors (first 24 h | second 24 h)

734

for 48 h. FACS analysis with propidium iodide staining was used to determine the

735

4N to 2N ratio. (b) Imetelstat (Im|Im) and imetelstat in combination with KU55933

736

(Im|Im + K) increased 4N DNA cell populations compared to no treatment (NT).

737

Treatment with KU55933 in the first 24 h decreased 4N DNA cell populations

738

compared to the respective treatment regimens using imetelstat in the first 24 h.

739

(c) No difference in sub-G1 populations, a readout of apoptosis and cell death,

740

was observed among cell lines undergoing different treatment regimens. ANOVA

741

and Fisher's LSD test were used to generate P-values (\* =  $P \leq 0.05$ ). Error bars

742

represent SD.

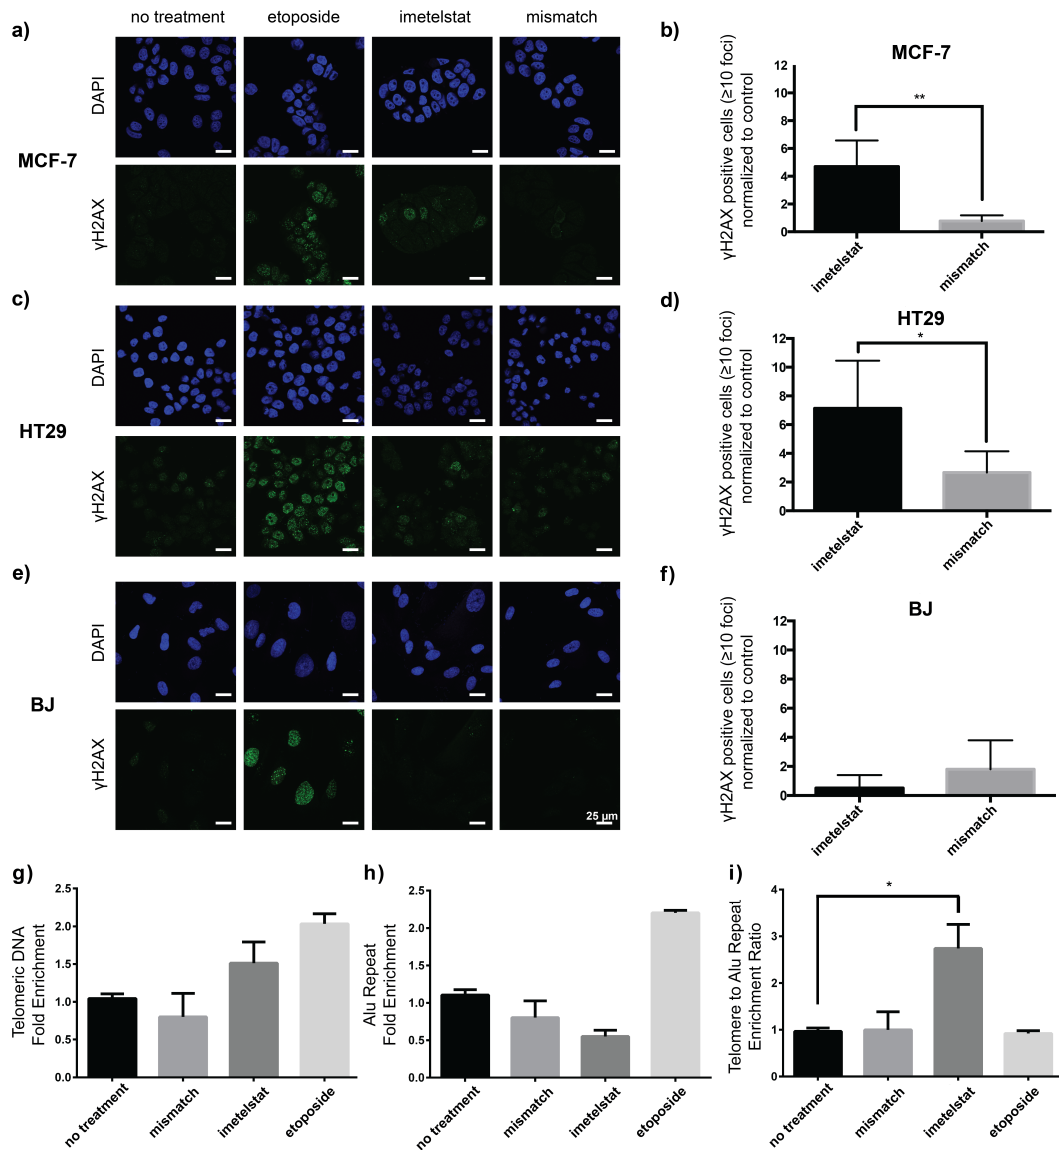

743

744

**Figure 3. Telomerase inhibition induces DNA damage foci in telomerase-**

**positive but not telomerase-negative cells.** (a-d) Immunocytochemistry

showed increased  $\gamma$ H2AX DNA damage foci in a subset of telomerase-positive

MCF-7 and HT29 cells treated for 24 h with imetelstat (10  $\mu$ M). The mismatch

control oligo (10  $\mu$ M) did not induce this effect. Etoposide (1.4  $\mu$ M) was used as a

positive control. (e-f) Imetelstat did not induce DNA damage foci in telomerase-

negative BJ primary human fibroblasts. Histograms show accumulation of cells

with  $\geq 10$  foci, normalized to the numbers obtained from no treatment controls.

Error bars represent SD. (g-i)  $\gamma$ H2AX-ChIP-qPCR of (g) telomeric region and (h)

Alu repeat region in MCF-7 cells. Enrichment values were normalized to beads

only controls. (i) The ratio of ChIP enrichment of telomeric region over the Alu

reference regions was indicative of telomere-specific enrichment of  $\gamma$ H2AX

signals (i). Error bars represent SEM. Student's *t*-test was used to generate P-

values (\* =  $P \leq 0.05$ , \*\* =  $P \leq 0.01$ ,  $n \geq 3$ ).

758



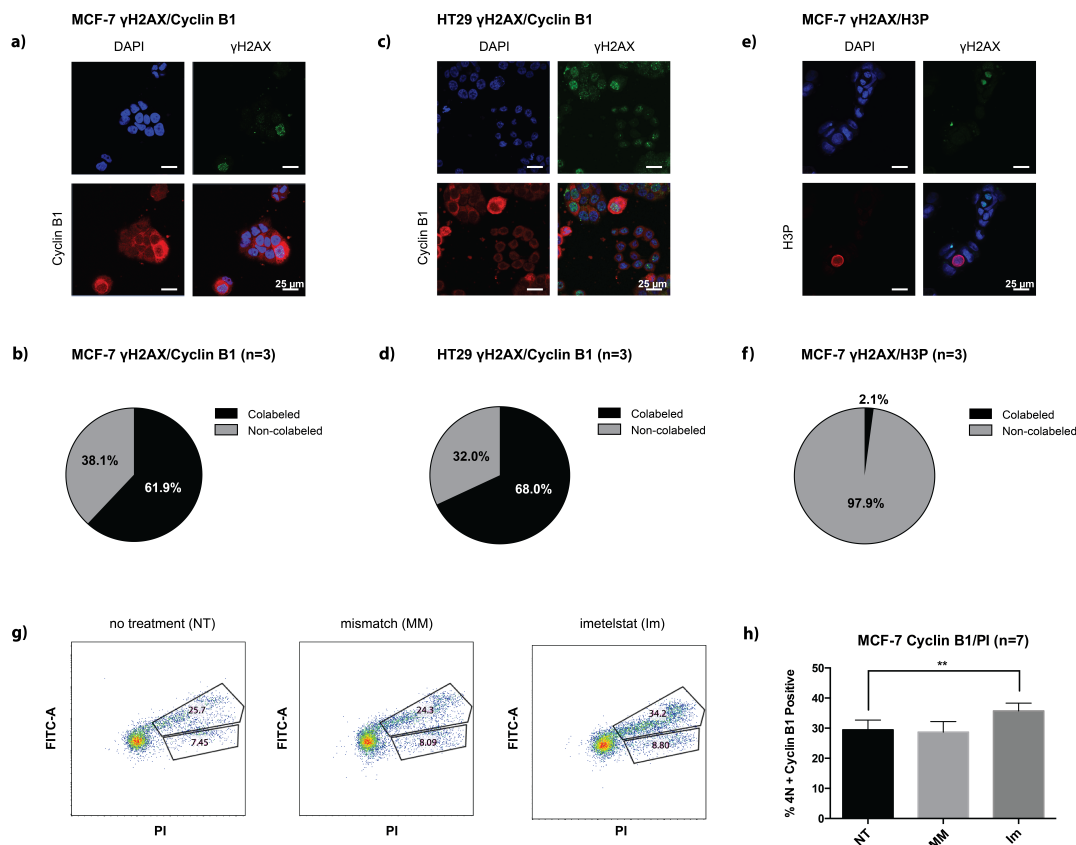

759

760

**Figure 4. Imetelstat increases the population of cells in late S/G2 phases.**

761

(a-c) Following 24 h treatment with imetelstat (10  $\mu$ M), MCF-7 and HT29 cells were labeled for  $\gamma$ H2AX in combination with cytoplasmic cyclin B1, a marker of late S/G2 phases, or phospho-histone H3 (H3P), a marker of M phase. (d-f) DNA damage foci-positive cells ( $\geq 10$  foci) co-labeled with cyclin B1 or H3P were quantified, with  $>400$  cells analyzed for each condition. (g-h) MCF-7 cells were treated with imetelstat (Im), the mismatch oligo (MM) or no drug (NT) for 24 h then labeled with FITC-conjugated anti-cyclin B1 and propidium iodide (PI).

762

ANOVA and Fisher's LSD test were used to generate P-values (\* =  $P \leq 0.05$ , \*\* =  $P \leq 0.01$ ). Error bars represent SD.

763

764

765

766

767

768

769

770

771

772

773

774

775

776

777

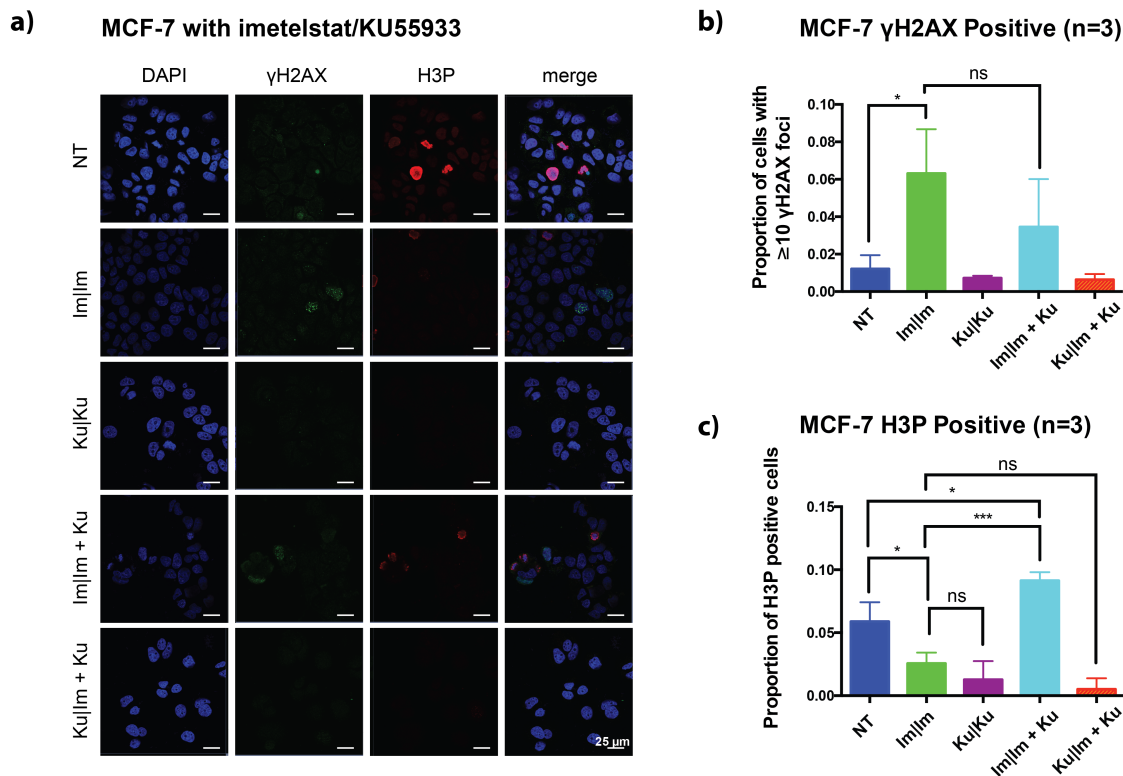

778  
779

780 **Figure 5. Functional ATM signaling is required for imetelstat-induced DNA**  
 781 **damage foci formation and the G2/M checkpoint stall.** (a) MCF-7 cells were  
 782 treated with the indicated inhibitor(s) for 48 h using the same scheme as Fig. 2  
 783 before γH2AX and phospho-histone H3 (H3P) labeling. (b-c) Images were scored  
 784 blindly to quantify co-labeling, with >400 cells scored per condition. ANOVA and  
 785 Fisher's LSD test were used to generate P-values (\* =  $P \leq 0.05$ , \*\* =  $P \leq 0.01$ , \*\*\*  
 786 =  $P \leq 0.001$ ). Error bars represent SD.

787  
788  
789  
790  
791  
792  
793  
794  
795  
796  
797  
798  
799  
800

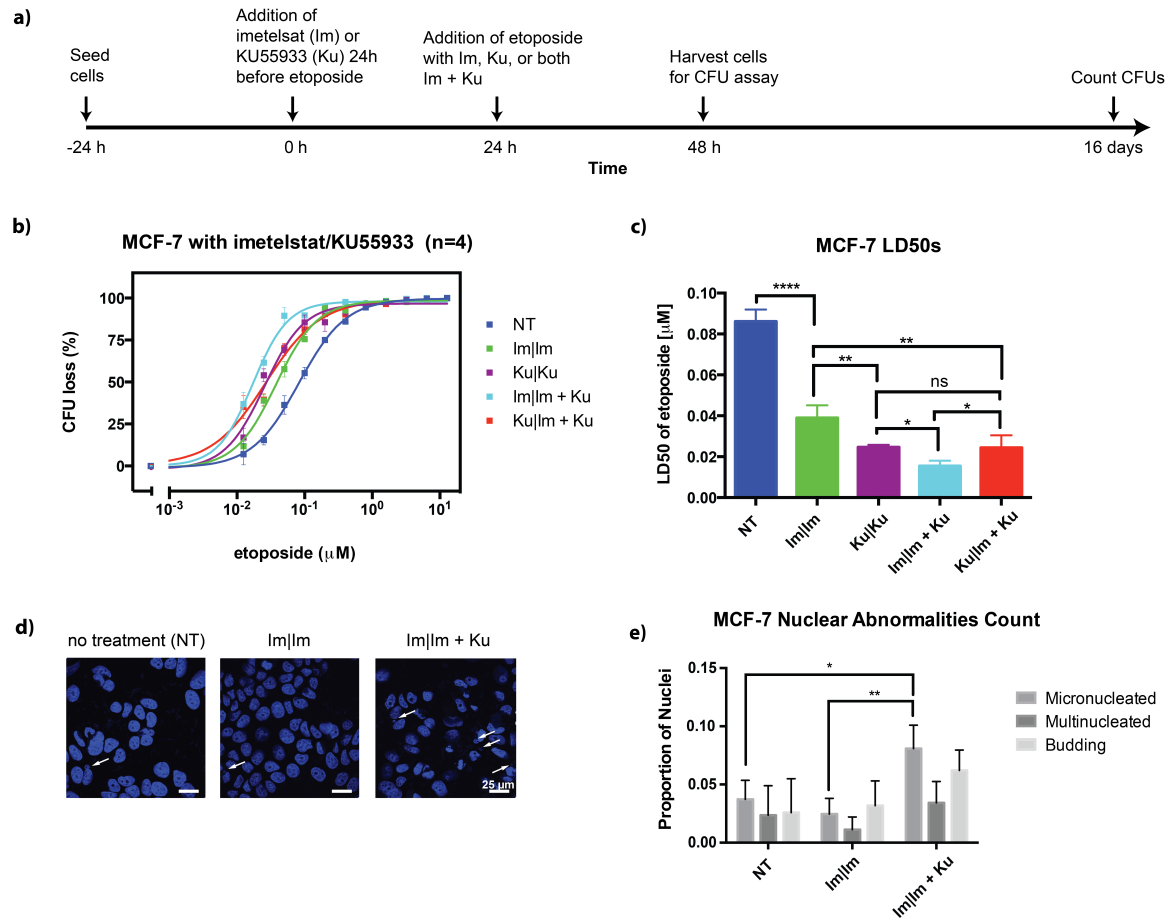

801  
802

803

804 **Figure 6. Imetelstat potentiation of etoposide cytotoxicity requires**  
 805 **functional ATM signaling.** (a) MCF-7 cells were treated with imetelstat (10 μM)  
 806 or KU55933 (10 μM) for 24 h prior to addition of serial dilutions of etoposide (12.8  
 807 – 0.0125 μM) in combination with the previously used inhibitor or in combination  
 808 with both inhibitors (Im + Ku). After 24 h incubation with etoposide, cells were  
 809 counted and seeded in soft agar using the colony formation assay (CFU).  
 810 Colonies were scored after 14 days. (b) Dose-response curves of MCF-7 cells  
 811 given the indicated inhibitors (first 24 h | second 24 h in combination with  
 812 etoposide) or no treatment (NT) before etoposide addition. (c) LD<sub>50</sub>s obtained  
 813 from dose-response curves. Error bars represent SEM. (d) Representative  
 814 images of DAPI nuclear staining for treatments examined. Arrows indicate  
 815 micronuclei. (e) Nuclear abnormalities were quantified from the same sets of  
 816 images as in Fig. 5. Error bars represent SD. ANOVA and Fisher's LSD test were  
 817 used to generate P-values (\* = P ≤ 0.05, \*\* = P ≤ 0.01, \*\*\* = P ≤ 0.001, \*\*\*\* = P ≤  
 818 0.0001).
